# Supplementary material
Source: Springer Nature journal article supplement (https://www.springermedizin.de/resource/supplementary/12957_2013_1417_MOESM2_ESM.pdf/9562534)

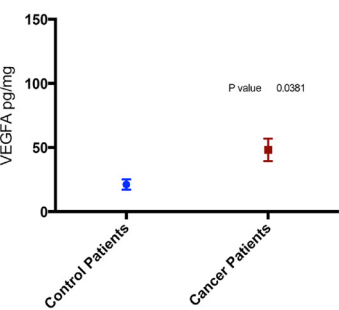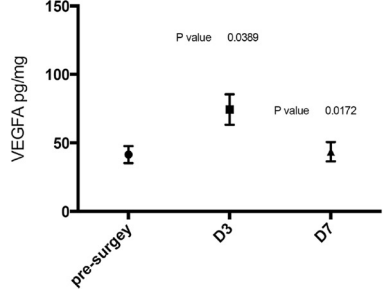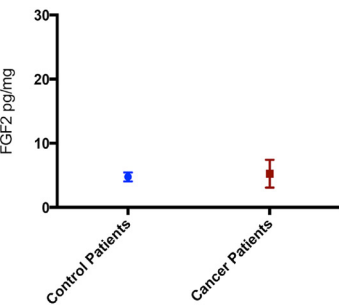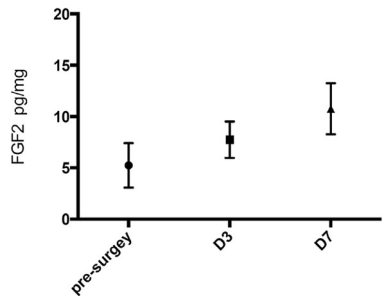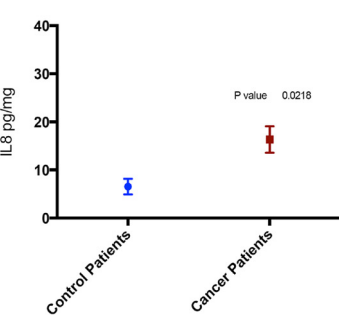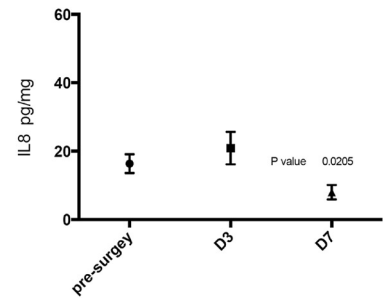

**A**

**B**

Supplement: MOESM2 [file 9562534]
